# Supplementary material for: Choroideremia Carriers: Dark-Adapted Perimetry and Retinal Structures
Source: PubMed Central journal article supplement — Invest Ophthalmol Vis Sci. 2022 Jul 11;63(8):4. doi: 10.1167/iovs.63.8.4 (PMC9284471; doi:10.1167/iovs.63.8.4), 2022-07-11
Supplement: iovs-63-8-4_s001.pdf [file iovs-63-8-4_s001.pdf]

**Supplementary Table 1. DCAP cyan test sensitivity values for controls**

| ID | Age (y) | Mean (dB) |         |               | Median (dB) |         |               |
|----|---------|-----------|---------|---------------|-------------|---------|---------------|
|    |         | Periphery | Macular | Peripapillary | Periphery   | Macular | Peripapillary |
| 1  | 37      | 54        | 56      | 47            | 56          | 56      | 50            |
| 2  | 48      | 55        | 59      | 59            | 56          | 61      | 59            |
| 3  | 37      | 53        | 54      | 51            | 53          | 57      | 52            |
| 4  | 28      | 53        | 59      | 56            | 53          | 61      | 55            |
| 5  | 38      | 53        | 58      | 59            | 55          | 61      | 60            |
| 6  | 37      | 54        | 58      | 54            | 57          | 59      | 55            |
| 7  | 37      | 43        | 58      | 58            | 44          | 59      | 57            |
| 8  | 39      | 57        | 62      | 62            | 57          | 61      | 61            |
| 9  | 33      | 51        | 60      | 52            | 53          | 61      | 50            |
| 10 | 29      | 50        | 54      | 53            | 51          | 57      | 53            |
| 11 | 24      | 53        | 57      | 58            | 53          | 57      | 57            |
| 12 | 34      | 55        | 58      | 56            | 55          | 59      | 55            |
| 13 | 28      | 50        | 56      | 54            | 49          | 57      | 53            |
